# Supplementary material for: Resolution of Hypothyroidism Restores Cold-Induced Thermogenesis in Humans
Source: PubMed Central journal article supplement (PMC6482913; doi:10.1089/thy.2018.0436), 2019-04-09
Supplement: Supp_Fig1.pdf [file Supp_Fig1.pdf]

## Supplementary Data

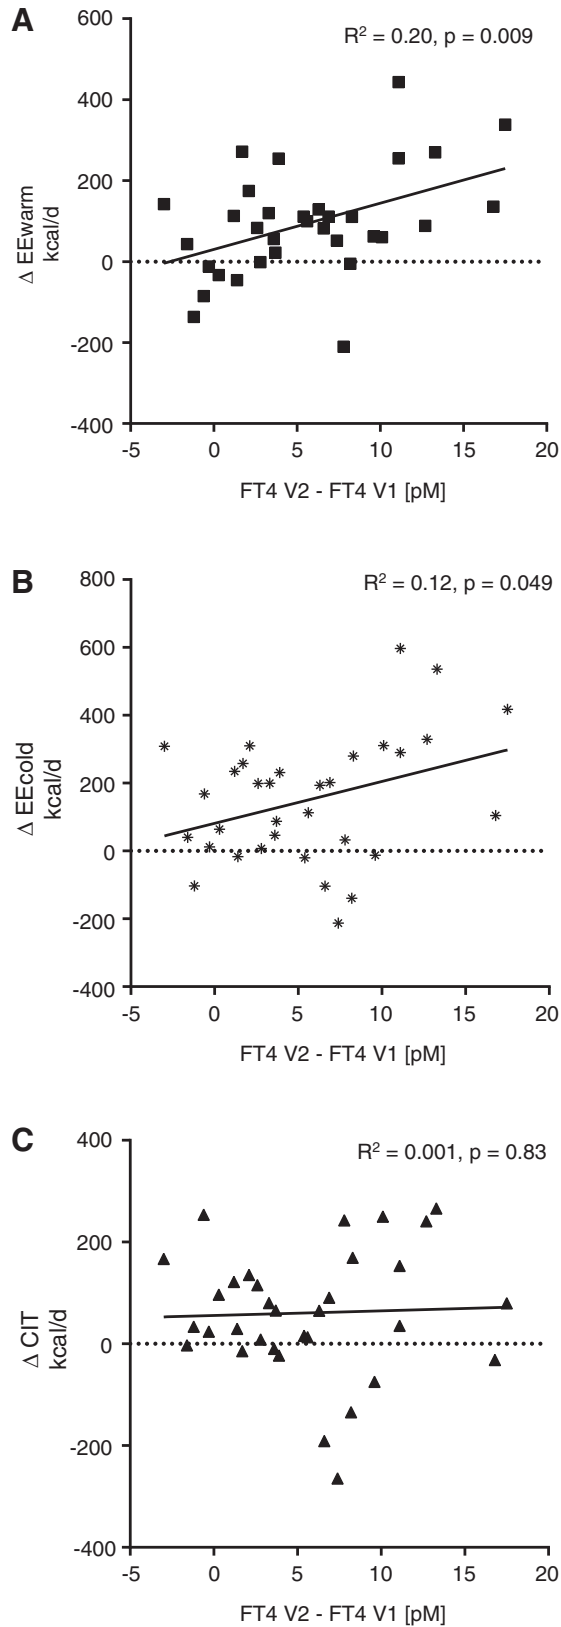

**SUPPLEMENTARY FIG. S1.** Relation between change in thyroid hormone status calculated as difference of free thyroxin levels (fT4) at the two visits and change in energy expenditure: (A)  $\Delta EE_{warm}$ :  $R^2=0.20, p=0.009$ ; (B)  $\Delta EE_{cold}$ :  $R^2=0.12, p=0.049$ ; (C)  $\Delta CIT$ :  $R^2=0.001, p=0.83$ . V1, visit 1 (hypothyroid); V2, visit 2 (euthyroid).
