# Supplementary material for: Resolution of Hypothyroidism Restores Cold-Induced Thermogenesis in Humans
Source: PubMed Central journal article supplement (PMC6482913; doi:10.1089/thy.2018.0436), 2019-04-09
Supplement: Supp_Fig2.pdf [file Supp_Fig2.pdf]

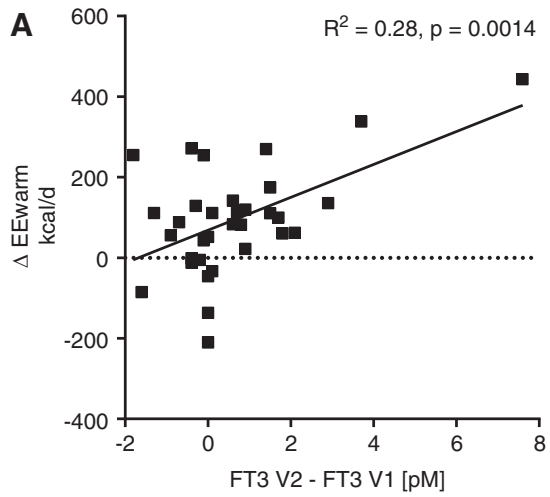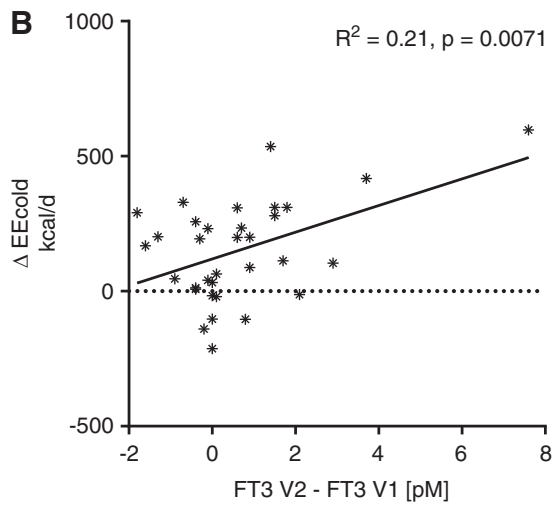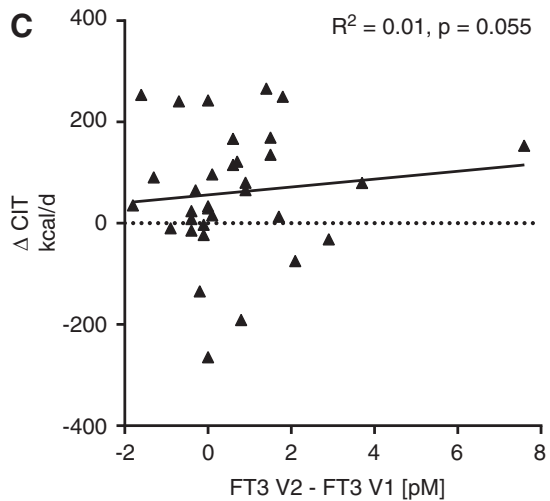

**SUPPLEMENTARY FIG. S2.** Relation between change in thyroid hormone status calculated as difference of free triiodothyronine levels (fT3) at the two visits and change in energy expenditure: (A)  $\Delta EE_{\text{warm}}$ :  $R^2=0.28, p=0.0014$ ; (B)  $\Delta EE_{\text{cold}}$ :  $R^2=0.21, p=0.0071$ ; (C)  $\Delta \text{CIT}$ :  $R^2=0.01, p=0.55$ .
